# Supplementary material for: Infective Endocarditis in Children as an Increasing Clinical Problem—A Case Series
Source: MDPI journal article supplement (doi:10.3390/children11030371), 2024-03-20
Supplement: s1 [file s1]

**Table S1.** The reference ranges of laboratory tests.

| <b>The reference ranges for laboratory tests</b>               |                                                                                                                             |
|----------------------------------------------------------------|-----------------------------------------------------------------------------------------------------------------------------|
| <b>The laboratory test</b>                                     | <b>The reference ranges</b>                                                                                                 |
| Red blood cells (RBC)                                          | 4,10 - 5,10 M/ul                                                                                                            |
| Hemoglobin (HGB)                                               | 12,0 – 15,5 g/dl                                                                                                            |
| Hematocrit (HCT)                                               | 35,00 - 46,00 %                                                                                                             |
| Erythrocyte mean corpuscular volume (MCV)                      | 80,0 - 96,0 fl                                                                                                              |
| Corpuscular hemoglobin (MCH)                                   | 26,0 - 32,0 pg                                                                                                              |
| Mean corpuscular hemoglobin concentration (MCHC)               | 32,0 - 36,0 g/dl                                                                                                            |
| White blood cells (WBC)                                        | 4,5 - 10,0 K/ul                                                                                                             |
| Platelet Count (PLT)                                           | 140 – 420 K/ul                                                                                                              |
| Erythrocyte sedimentation rate (ESR)                           | First hour 2 – 12 mm/1h<br>Second hour 4 – 20 mm/2h                                                                         |
| Creatinine                                                     | 0,57 - 1,11 mg/dl                                                                                                           |
| Urea                                                           | 15,0 - 40,0 mg/dl<br>>90 - normal GFR                                                                                       |
| Estimated Glomerular Filtration Rate (eGFR)                    | 60 - 89 - mildly reduced GFR<br>30 - 59 - moderately reduced GFR<br>15 - 29 - severely reduced GFR<br>< 15 - kidney failure |
| protein in 24-h urine collection                               | < 0,15 g/day                                                                                                                |
| Rheumatic factor (RF)                                          | < 30,0 IU/ml                                                                                                                |
| Antinuclear antibodies (ANA)                                   | + / + / +                                                                                                                   |
| Anti-neutrophil cytoplasmic proteinase 3 antibodies (PR3-ANCA) | + / + / +                                                                                                                   |
| Lactate dehydrogenase (LDH)                                    | 125 – 243 U/l                                                                                                               |
| D-dimer                                                        | < 500 ug/l                                                                                                                  |
| Albumins in serum                                              | 3,8 – 5,4 g/dl                                                                                                              |
| C-reactive protein (CRP)                                       |                                                                                                                             |
| Procalcitonin (PCT)                                            | < 0,05 ng/ml                                                                                                                |
| Troponin                                                       | < 15,6 ng/l                                                                                                                 |
| N-terminal pro b-type natriuretic peptide (NT-proBNP )         | < 125,0 pg/ml                                                                                                               |
